# Supplementary material for: The Biosynthesis of 1-octene-3-ol by a Multifunctional Fatty Acid Dioxygenase and Hydroperoxide Lyase in Agaricus bisporus
Source: MDPI journal article supplement (doi:10.3390/jof8080827), 2022-08-08
Supplement: s1 [file s1]

## SUPPLEMENTARY MATERIAL

**Table S1.** Primers used in this study

| Primer name | Sequence (5'–3') <sup>a</sup>                              |
|-------------|------------------------------------------------------------|
| AbLOX-F1    | ATGCCTCGCCCTCAACAATTC                                      |
| AbLOX-R1    | CTCGCAATCTGAATCTGAGTCTACC                                  |
| AbLOX-F     | CATGCCATGGGC ATGCCTCGCCCTCAACAATTC                         |
| AbLOX-R     | AAGGAAAAAAGCGGCCGCTCGCAATCTGAATCTGAG                       |
| AbLDS1-F1   | ATGTCCCACTTGACAAATCTAC                                     |
| AbLDS1-OL-R | CCCATAACTTCAATCGCCTTC                                      |
| AbLDS1-OL-F | GAAGGCGATTGAAGTTATGGG                                      |
| AbLDS1-R1   | TTACACTTTCACCTGCAACTG                                      |
| AbLDS1-F    | <i>GGGTACCCTCGAGGGATCCGAATTCATGTCCCACTTGACAAATCTACTTCT</i> |
| AbLDS1-R    | <i>TTTAAGCAGAGATTACCTATCTAGATTACACTTTCACCTGCAAC</i>        |
| AbLDS2-F1   | ATGTCCAAGAGGCTCTCTGG                                       |
| AbLDS2-OL-R | CAGGATGGCAGACTAATGG                                        |
| AbLDS2-OL-F | CCATTAGTCGTGCCATCCTG                                       |
| AbLDS2-R1   | AGCATCATACTGAATGGTAAGAGAC                                  |
| AbLDS2-F    | <i>TGGTGGTATCGAAGGTAGGCATATGATGTCCAAGAGGCTCTCTGGTATC</i>   |
| AbLDS2-R    | <i>TTTAAGCAGAGATTACCTATCTAGAAGCATCATACTGAATGG</i>          |
| AbHPL-F1    | ATGGTCCTTGACGTTACGCT                                       |
| AbHPL-R1    | TCATGCTTGCGCACGAGG                                         |
| AbHPL-F     | GGAATTCCATATGGTCCTTGACGTTACGCT                             |
| AbHPL-R     | CCCGCGGCCGCTCATGCTTGCGCACGAGG                              |
| HRasAbLOX-F | <i>ACACAACAACCTTATCACTAGTCTCGCAATCTGAATCTGAGTCTACC</i>     |
| HRasAbLOX-R | <i>TGCATGCCAATTCTAGAGGGCCCCCTCGCCCTCAACAATTCATT</i>        |

|           |                           |
|-----------|---------------------------|
| Hyg-F     | CTTCTGCGGGCGATTTGTG       |
| Hyg-R     | TCGTTATGTTTATCGGCACTTT    |
| asAbLOX-F | CTCGCAATCTGAATCTGAGTCTACC |
| asAbLOX-R | CCTCGCCCTCAACAATTCATT     |
| Ef1a-F    | AACAAGGTTCCCCTGGTGAC      |
| Ef1a-R    | CGGGTGATTGAGGACGATG       |
| RT-LOX-F  | AGCTCCGAGCGACTGTTGGC      |
| RT-LOX-R  | GGGTGCGTTTGATCTCGTCA      |

---

<sup>a</sup> Italic letters show homology arm sequence

|              |                                                                 |     |
|--------------|-----------------------------------------------------------------|-----|
| <i>AbLOX</i> | -MFRPQQFILPDLLSSCPLEDGLNPHYREAAAESRTWINSFNIFSNRKRAEFIQGLNEL     | 59  |
| <i>Cop4</i>  | MRPTARQFTLPDLFSICPLQDATNPWKQAAAESRAWINSYNIETTRKRAEFIQGSNEL      | 60  |
| <i>AbLOX</i> | CSHVYCYAGYEEFRTTCDFVNVLFVVDEISDEQSGKDARATGLSYAESMRNADWDDNSVV    | 119 |
| <i>Cop4</i>  | CSHVYAYAGYEEFRTTCDFVNVLFVVDEISDDQNGQDARATGRIFVNAMRDAFWDDGSIL    | 120 |
| <i>AbLOX</i> | AKITKEFRARLIRIRAGHNNFRFVASSDAYTRCVGREAELEAGEVLSLEEYIPLRRNNS     | 179 |
| <i>Cop4</i>  | AKITHEFRERFVRLAGPKTVRRFADLCESYTD CVAREAELELRERNOVLGLNDFIALRRONS | 180 |
| <i>AbLOX</i> | AVLLCFDLVEYILGVLDLPESIIYQNATFLKAYWAACDFVCWANDVYSYNVEQSKGHTGNNV  | 239 |
| <i>Cop4</i>  | AVLLCYSLVEYILGIDLDEVEYEDFTFAKAYWAACDFVCWANDVYSYDMEQAKGHTGNNV    | 240 |
| <i>AbLOX</i> | VTVLMNDRQICLQEACDYIGDRCRQFMNDYLAARDELRA--TVGGDASRFIDALGYWIIIG   | 297 |
| <i>Cop4</i>  | VTVLMKEKDLSLQEASDYIGRECEKQMRDYLEAKSQLQSTDLPQFAVRYTEALGYWMVG     | 300 |
| <i>AbLOX</i> | NMEWSFESPRYFGHEHDEIKRTLTTLTKPSEVHEE---VDSDSDE                   | 340 |
| <i>Cop4</i>  | NLVWSFESQRYFGAHERVKATHVVHLRPSSVLEASCDSDSDSDC-                   | 345 |

**Figure S1.** The amino acid sequence identify between *AbLOX* in *Agaricus bisporus* H97 and *Cop4* in *Coprinus cinereus*. *AbLOX*, putative lipoxygenase in *A. bisporus* H97 (NCBI accession number XP\_006459300); *Cop4*, linoleate 10R-lipoxygenase *Cop4* (NCBI accession number XP\_001836356).

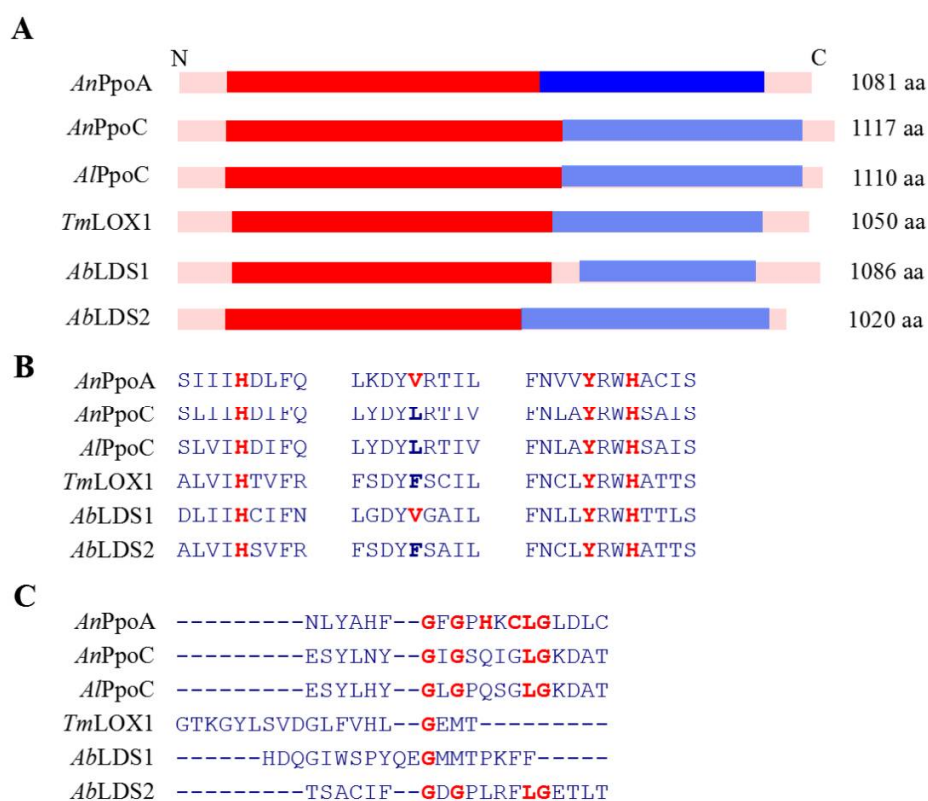

**Figure S2.** Domain structure and catalytic active site of the putative heme dioxygenase from *Agaricus bisporus* H97 and other selected fungi. A, Domain structure. Solid red box shows the heme peroxidase/dioxygenase domain; solid blue box shows the heme-thiolate domain with isomerization activity; solid light blue box shows the heme-thiolate domain without isomerization activity. B, Bold red letters show the conserved amino acid residues in the active site, bold purple letters show non-conserved amino acid residues in the active site. C, Heme-thiolate domain amino acid sequence alignment. Bold red letters show amino acid residues that are conserved in the catalytically active site. AbLDS1, linoleate diol synthase 1 in *A. bisporus* H97 (NCBI accession number XP\_006456120); AbLDS2, linoleate diol synthase 2 in *A. bisporus* H97 (NCBI accession number XP\_006461894); AnPpoA, *Aspergillus nidulans* PpoA

(NCBI accession number AAR88626); *AnPpoC*, *As. nidulans* PpoC (NCBI accession number AAT36614); *AlPpoC*, *As. luchuensis* PpoC (NCBI accession number GAT23542); *TmLOX1*, *Tricholoma matsutake* lipoxygenase 1 (NCBI accession number KAF8239383).

|              |                                                                |     |
|--------------|----------------------------------------------------------------|-----|
| <i>TmHPL</i> | MSTKHSSLSAFIPSSSTSPPLYNFPVPSFLNITGKSF TWLYTTLAIVFALLVLEQSVYRY  | 60  |
| <i>AbHPL</i> | MVL-----DVHAALNVLHNASYAP---AVQGSTLTWFTTFTGIIGGLLALQAVYRY       | 52  |
| <i>TmHPL</i> | KKRHLPQAKWTTFITIGKFADSLSPITLEGYKKQWDGGLSAVSVFNIFIVMASSNDYARKI  | 120 |
| <i>AbHPL</i> | KKRHLPQDSWTIPVIGRFADSMSPITMEGYKKQWDGGLSVSVFNIFIVMASSNQYARKI    | 112 |
| <i>TmHPL</i> | LNSPGEFAEFCIVHAAKSILLSDNWVFLNGKAHTSYRRVLNSLFTRRALSTIYIPIEENITR | 180 |
| <i>AbHPL</i> | LNSPMYAEFALVHSGKLVIGSDNWVFLTGKDHVDYRKVLNLLFTRKALCIYLGIQDSVAR   | 172 |
| <i>TmHPL</i> | KHEAKWLATASKESAPQTIMMTVRHLNMDTSLNVFCGKHISEEAALEINEKYWAITKALE   | 240 |
| <i>AbHPL</i> | KHYTKWLDEAAADPSAKPTIMMTARQANMETSLEVFCCGYIPENTVEEINDKYWRITQSL   | 232 |
| <i>TmHPL</i> | LVNFPFLALPGTKVYNATQARKSAIHWLEIAANRSKKAMANGAEPCMLDEWVQILNDPSY   | 300 |
| <i>AbHPL</i> | LVNFPFLALPGTKVYKAIQARKFVMHWLEFAASKSKLAMAEGGTPECMDEWVSIMAEPCY   | 292 |
| <i>TmHPL</i> | NGRRDFSDEEMAVLFSFLFASQDALSSAVIYGFQHLADHPEVLAKIREEQEKVRQGDYQ    | 360 |
| <i>AbHPL</i> | KGRKDFSNYEMAVVFSFLFASQDAMSSCVIYGFQHLADHPDILEKVRQEQEVRMGNYE     | 352 |
| <i>TmHPL</i> | KPLTLEMLDQMTYINAVVKESLRIKPPVTMIPYKALKAFPIISDDYVVPFGSMVIPSEFNS  | 420 |
| <i>AbHPL</i> | DPLTLEMLDEMVLQAVVKESLRIKPPVTMVPYCKKPFPIINENYTVVFGSMVIPSEFNS    | 412 |
| <i>TmHPL</i> | LHDPSVYPEPEITFNPDRLDPESANQNPKNFIFGSGPHRCIGFEYTFINIAIVLATAA     | 480 |
| <i>AbHPL</i> | LHDSEIYPEPEKTHPERWLDSKGSANSNSQNYLVFGSGPHKCIGLEYAQMIIALMLANAA   | 472 |
| <i>TmHPL</i> | VIMNIEHDVTPISDKVEIIATLFPKDGCRRLRSPRTQHP                        | 519 |
| <i>AbHPL</i> | VIMNFEHEITPRSGEVEIIATLFPKDGCRRLRSPRAQA-                        | 510 |

**Figure S3.** The amino acid sequence identify between *AbHPL* in *Agaricus bisporus* H97 and *TmHPL* in *Tricholoma matsutake*. *AbHPL*, putative fatty acid hydroperoxide lyase in *A. bisporus* H97 (NCBI accession number XP\_006454582); *TmHPL*, fatty acid hydroperoxide lyase in *T. matsutake* (NCBI accession number KAF8221779).

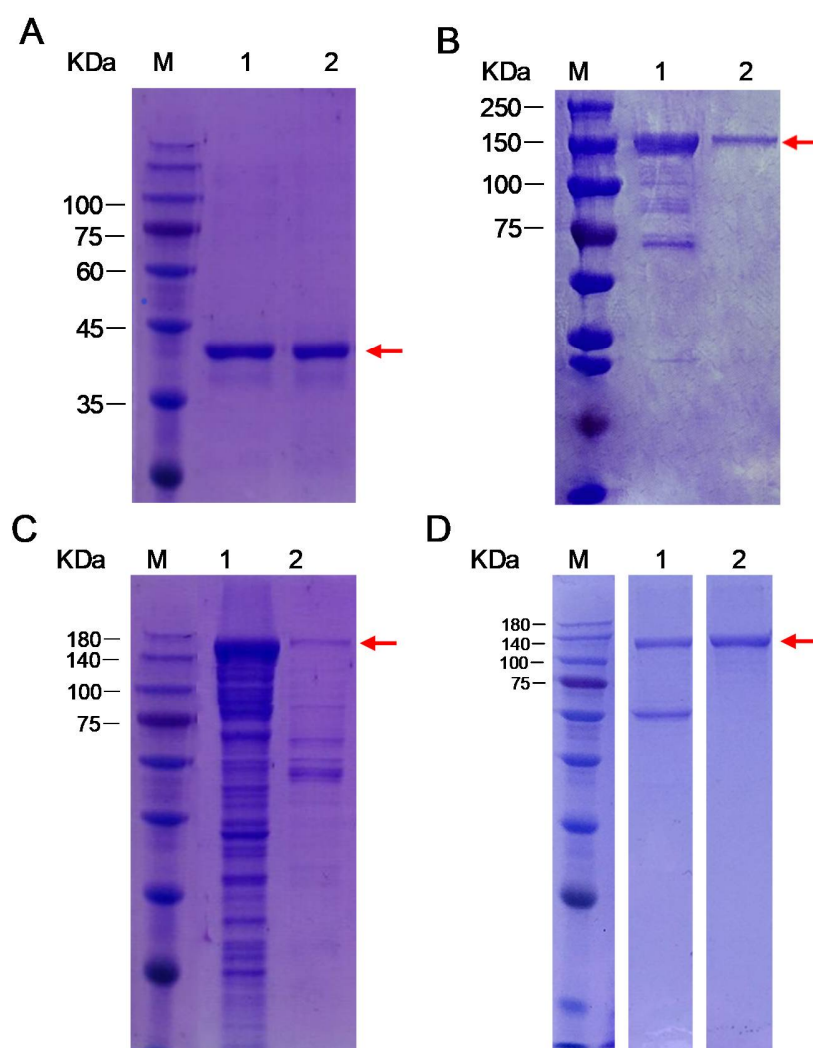

**Figure S4.** Protein purification of the putative enzymes involved in 1-octen-3-ol biosynthesis by nickel ion affinity chromatography column. (A) *AbLOX*. Lane 1 and 2, elution with 100 and 150 mM imidazole. (B) *AbLDS1*. Lane 1 and 2, elution with 100 and 150 mM imidazole. (C) *AbLDS2*. Lane 1 and 2, elution with 20 and 100 mM imidazole. (D) *AbHPL*. Lane 1 and 2, elution with 100 and 150 mM imidazole.

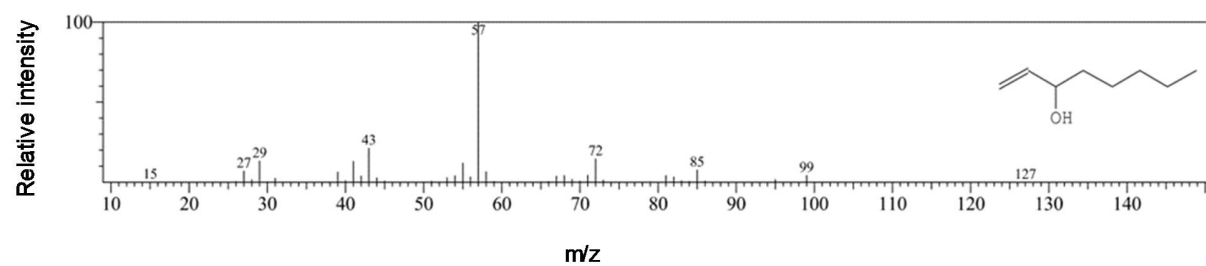

Figure S5 Mass spectrum of 1-octen-3-ol from the enzymatic linoleic acid reaction by *AbLOX*+*AbHPL*
